# Supplementary material for: Metal–organic framework (MOF): lanthanide(iii)-doped approach for luminescence modulation and luminescent sensing
Source: Royal Society of Chemistry journal article supplement (doi:10.1039/c002822n), 2010-01-01
Supplement: c002822n.pdf [file c002822n.pdf]

## Supporting Information

# Metal-organic framework (MOF): lanthanide(III)-doped approach for luminescence modulation and luminescent sensing

Feng Luo and Stuart R. Batten

### 1. Experimental Section

#### 1.1 Materials and Methods.

Commercially available reagents have been used as received without further purification. Elemental analysis for C, H, and N was performed on a Perkin-Elmer 240 analyzer. TGA analysis was performed with a heating rate of 5°C/min using a NETZSCH STA 449C simultaneous TG-DSC instrument. PXRD research was performed on a Rigaku D/mex-rB instrument. ICP analysis was performed on a Vista PRO instrument.

#### 1.2 The following preparation is designed for EA, ICP and PXRD studies:

**1.2.1 Synthesis of Eu/Tb@1:** The single crystal samples (6g) of **1** were immersed in 30mL of a 1mol/L EuCl<sub>3</sub> or Tb(ClO<sub>4</sub>)<sub>3</sub> solution for 24h, and then the lanthanide-ion-infused **Eu/Tb@1** was isolated by filtration and drying at 30°C for 24h.

**1.2.2 Synthesis of Cu-Eu/Co-Tb@1:** **Eu/Tb@1** powder samples (1g) were immersed in 20mL of a 1mol/L CuCl<sub>2</sub> or CoCl<sub>2</sub> solution for 24h, and then the metal-ion-infused **Cu-Eu/Co-Tb@1** was isolated by filtration and drying at 30°C for 24h.

**1.3 Luminescence studies:** Photoluminescence of these researches was carried out in the solid state at room temperature. **Eu/Tb@1** were produced by immersing single crystal samples of **1** (40 mg) in 10mL of aqueous EuCl<sub>3</sub> or Tb(ClO<sub>4</sub>)<sub>3</sub> solutions at various concentrations for 24h (10<sup>-6</sup>~10<sup>-3</sup> mol/L for EuCl<sub>3</sub> or 10<sup>-7</sup>~10<sup>-3</sup> mol/L for Tb(ClO<sub>4</sub>)<sub>3</sub>), then isolated by filtration and drying at 30°C for 24 h. Similarly, **M-Eu/Tb@1** were prepared by immersing powders of pre-synthesized **Eu/Tb@1** (see the **Synthesis of Eu/Tb@1** section, 40 mg) in 10mL 10<sup>-2</sup>mol/L MCl<sub>x</sub> aqueous solutions for 24h (M= Na<sup>+</sup>, K<sup>+</sup>, Zn<sup>2+</sup>, Ni<sup>2+</sup>, Mn<sup>2+</sup>, Co<sup>2+</sup>, Cu<sup>2+</sup>) then isolated by filtration and drying at 30°C for 24 h. **Cu-Eu/Co-Tb@1** were yielded by immersing powders of pre-synthesized **Eu/Tb@1** (40 mg) in 10mL of aqueous CuCl<sub>2</sub> or CoCl<sub>2</sub> solutions for 24h with the concentration in the range of 10<sup>-2</sup>~10<sup>-6</sup>mol/L, respectively, then isolated by filtration and drying at 30°C for 24 h. Photoluminescence spectra were measured using a Hitachi F2500 fluorescence spectrometer, with excitation wavelength of 339nm, PMT voltage of 400V, scan speed of 300 nm/min, slit width of 5

nm for **1**, corresponding vales of 322nm, 700V, 300 nm/min, 2.5 nm for **Eu@1** and **M-Eu@1**, and 316nm, 400V, 300 nm/min, 2.5 nm for **Tb@1** and **M-Tb@1**.

**2. Figure section.**

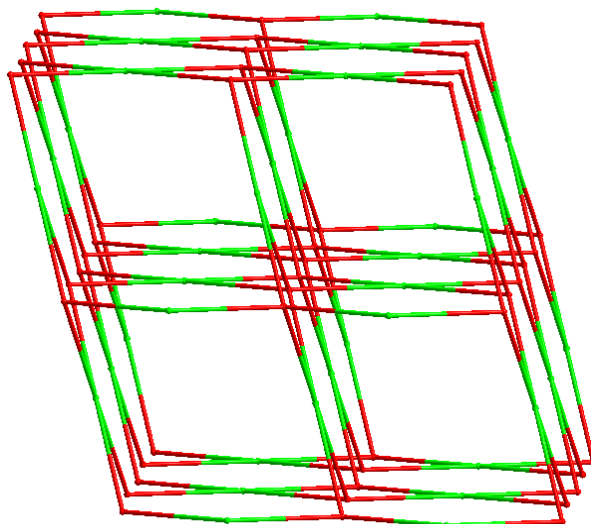

**Fig. S1** Schematic description of the PtS net of **1** built on square L nodes (green) and tetrahedral zinc nodes (red).

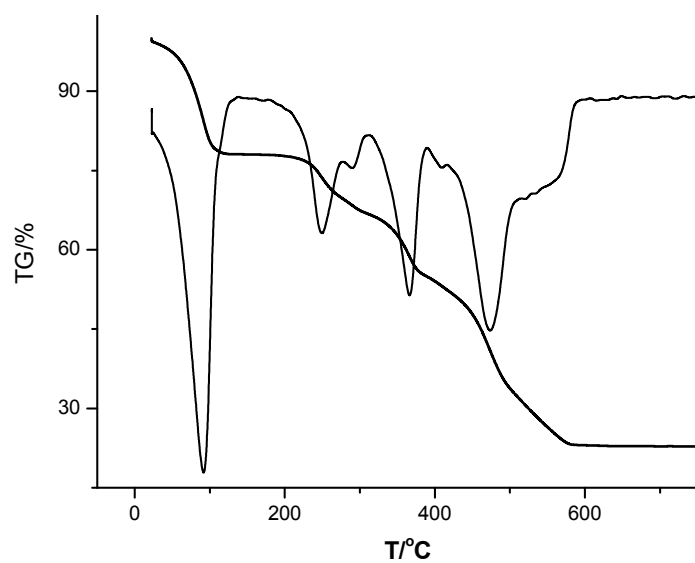

**Fig. S2** The TG-DTA plot of **1**.

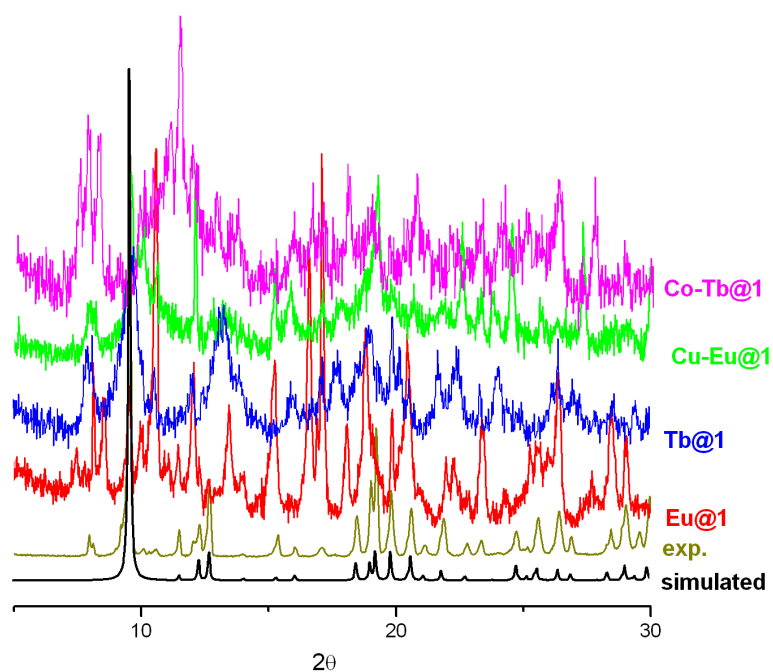

**Fig. S3** The simulated and experimental PXRD patterns of these samples: black/simulated result of **1**, brown/experimental result of **1**, red/Eu@1, blue/Tb@1, green/Cu-Eu@1, purple/Co-Tb@1.

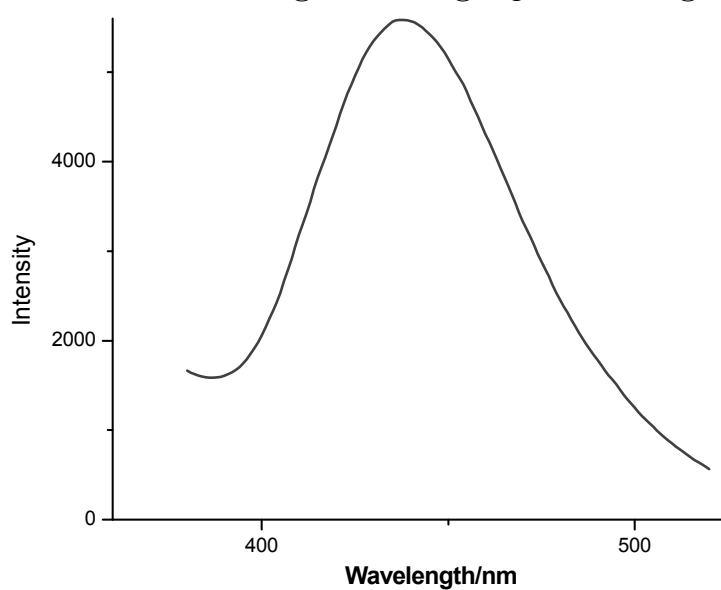

**Fig. S4** Photoluminescence spectra of polymer **1**.
